# Supplementary material for: RRM1 Expression as a Prognostic Biomarker for Unresectable or Recurrent Biliary Tract Cancer Treated with Gemcitabine plus Cisplatin
Source: MDPI journal article supplement (doi:10.3390/jcm10204652), 2021-10-11

Table S1. Baseline characteristics according to each biomarker expression

|                              | hENT1    |          | P value | RRM1     |          | P value | DCK      |          | P value | CDA      |          | P value |
|------------------------------|----------|----------|---------|----------|----------|---------|----------|----------|---------|----------|----------|---------|
|                              | Negative | Positive |         | Negative | Positive |         | Negative | Positive |         | Negative | Positive |         |
| Age (mean±SD)                | 60.3±5.4 | 66.2±8.9 | 0.072   | 64.7±9.5 | 65.1±6.5 | 0.876   | 65.3±9.2 | 63.4±6.9 | 0.54    | 64.7±9.5 | 63.4±6.9 | 0.893   |
| Sex                          |          |          | 0.704   |          |          | 0.461   |          |          | 0.135   |          |          | 1       |
| Male                         | 6        | 14       |         | 15       | 5        |         | 16       | 4        |         | 13       | 7        |         |
| Female                       | 3        | 11       |         | 8        | 5        |         | 7        | 7        |         | 8        | 5        |         |
| Primary tumor site           |          |          | 0.024   |          |          | 0.201   |          |          | 0.255   |          |          | 0.271   |
| Extrahepatic                 | 3        | 5        |         | 4        | 4        |         | 4        | 4        |         | 3        | 5        |         |
| Gallbladder                  | 1        | 15       |         | 11       | 5        |         | 13       | 3        |         | 11       | 4        |         |
| Intrahepatic                 | 5        | 5        |         | 8        | 1        |         | 6        | 4        |         | 7        | 3        |         |
| Pathological differentiation |          |          | 0.716   |          |          | 0.396   |          |          | 0.425   |          |          | 1       |
| Well                         | 1        | 1        |         | 2        | 0        |         | 1        | 1        |         | 1        | 1        |         |
| Moderately                   | 5        | 11       |         | 9        | 7        |         | 9        | 7        |         | 11       | 5        |         |
| Poorly                       | 3        | 10       |         | 9        | 3        |         | 10       | 3        |         | 8        | 4        |         |
| Stage                        |          |          |         |          |          |         |          |          | 0.045   |          |          | 0.69    |
| Metastatic disease           |          |          |         |          |          |         | 19       | 5        |         | 16       | 8        |         |
| Recurrent disease            | 4        | 6        | 0.395   | 5        | 5        | 0.215   | 4        | 6        |         | 5        | 4        |         |
| Metastatic sites             |          |          |         |          |          |         |          |          |         |          |          |         |
| Liver metastasis             | 3        | 13       | 0.448   | 11       | 5        | 1       | 12       | 4        | 0.477   | 10       | 6        | 1       |
| Lung metastasis              | 2        | 3        | 0.591   | 3        | 2        | 0.627   | 2        | 3        | 0.3     | 3        | 2        | 1       |
| Peritoneal seeding           | 1        | 5        | 1       | 5        | 1        | 0.64    | 3        | 3        | 0.363   | 4        | 2        | 1       |
| Lymph node metastasis        | 5        | 15       | 1       | 13       | 6        | 1       | 16       | 4        | 0.135   | 11       | 8        | 0.486   |
| Number of metastatic sites   |          |          | 0.014   |          |          | 0.73    |          |          | 0.646   |          |          | 0.867   |
| 1                            | 7        | 12       |         | 12       | 6        |         | 12       | 7        |         | 12       | 6        |         |
| 2                            | 0        | 12       |         | 8        | 4        |         | 8        | 4        |         | 7        | 5        |         |
| 3 or more                    | 2        | 1        |         | 3        | 0        |         | 3        | 0        |         | 2        | 1        |         |
| IHC expression positive      |          |          |         |          |          |         |          |          |         |          |          |         |
| hENT1                        | 1        | 9        | 0.217   | 15       | 9        | 0.217   | 18       | 7        | 0.425   | 13       | 11       | 0.107   |
| DCK                          | 4        | 7        | 0.425   | 6        | 5        | 0.24    | 5        | 5        | 0.24    | 7        | 2        | 0.422   |
| CDA                          | 1        | 11       | 0.107   | 10       | 2        | 0.422   | 9        | 3        | 0.71    | 7        | 3        | 0.71    |

hENT1, human Equilibrative Nucleoside Transporter; RRM1, Ribonucleotide Reductase M1; DCK, deoxycytidine kinase; CDA, deoxycytidine deaminase

Table S2. Multivariate analysis for progression free survival in each biomarker including peritoneal seeding and lung metastasis or number of metastatic sites

|                                             | hENT1               |         | DCK                 |         | CDA                 |         | RRM1                |         |
|---------------------------------------------|---------------------|---------|---------------------|---------|---------------------|---------|---------------------|---------|
|                                             | HR (95%CI)          | P value |
| <b>Including metastasis site</b>            |                     |         |                     |         |                     |         |                     |         |
| Biomarker                                   | 1.71<br>(0.70-4.17) | 0.239   | 0.77<br>(0.34-1.71) | 0.512   | 0.91<br>(0.42-2.01) | 0.821   | 2.23<br>(0.93-5.37) | 0.074   |
| Peritoneal seeding                          | 3.16<br>(1.15-8.70) | 0.026   | 3.86<br>(1.38-10.8) | 0.010   | 3.39<br>(1.24-9.28) | 0.018   | 4.42<br>(1.52-12.9) | 0.006   |
| Lung metastasis                             | 8.85<br>(2.64-29.6) | <.001   | 9.28<br>(2.67-32.3) | <.001   | 7.83<br>(2.37-25.8) | 0.001   | 8.20<br>(2.44-27.5) | 0.001   |
| <b>Including number of metastatic sites</b> |                     |         |                     |         |                     |         |                     |         |
| Biomarker                                   | 1.16<br>(0.46-2.91) | 0.753   | 1.52<br>(0.69-3.35) | 0.299   | 0.93<br>(0.42-2.07) | 0.867   | 2.22<br>(0.96-5.16) | 0.063   |
| Number of metastatic sties                  | 2.91<br>(1.49-5.68) | 0.002   | 3.27<br>(1.68-6.38) | <.001   | 2.97<br>(1.55-5.67) | 0.001   | 3.33<br>(1.69-6.58) | 0.001   |

Table S3. Multivariate analysis for overall survival in each biomarker including peritoneal seeding or number of metastatic sites

|                                             | hENT1               |         | DCK                 |         | CDA                 |         | RRM1                |         |
|---------------------------------------------|---------------------|---------|---------------------|---------|---------------------|---------|---------------------|---------|
|                                             | HR (95%CI)          | P value |
| <b>Including metastasis site</b>            |                     |         |                     |         |                     |         |                     |         |
| Biomarker                                   | 1.74<br>(0.73–4.14) | 0.210   | 0.83<br>(0.38–1.81) | 0.647   | 1.38<br>(0.65–2.92) | 0.407   | 3.33<br>(1.37–8.07) | 0.008   |
| Peritoneal seeding                          | 2.69<br>(1.05–6.94) | 0.040   | 3.26<br>(1.24–8.62) | 0.017   | 3.07<br>(1.19–7.88) | 0.020   | 4.99<br>(1.76–14.2) | 0.003   |
| <b>Including number of metastatic sites</b> |                     |         |                     |         |                     |         |                     |         |
| Biomarker                                   | 1.70<br>(0.72–4.03) | 0.228   | 1.21<br>(0.55–2.62) | 0.638   | 1.23<br>(0.57–2.65) | 0.591   | 3.44<br>(1.40–8.45) | 0.007   |
| Number of metastatic sties                  | 1.62<br>(0.95–2.74) | 0.074   | 1.79<br>(1.05–3.05) | 0.032   | 1.69<br>(1.00–2.84) | 0.049   | 2.30<br>(1.30–4.05) | 0.004   |

Figure S1. Representative examples of negative immunohistochemical labeling profiles. (A) hENT1 in extrahepatic cholangiocarcinoma (eCCA) (B) DCK in gallbladder cancer, (C) CDA in eCCA, (D) Faint staining of RRM1 in eCCA.

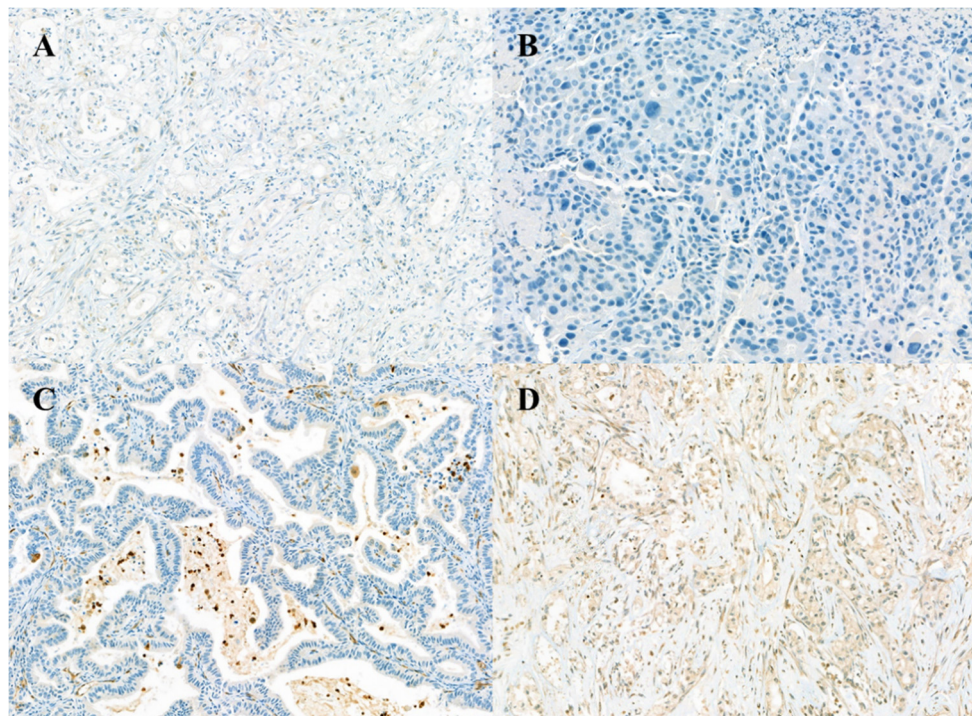

Supplement: s1 [file s1]
